# Supplementary material for: Direct MYD88L265P gene detection for diffuse large B-cell lymphoma (DLBCL) via a miniaturised CRISPR/dCas9-based sensing chip
Source: Royal Society of Chemistry journal article supplement (doi:10.1039/d1lc01055g), 2022-01-01
Supplement: d1lc01055g4.pdf [file d1lc01055g4.pdf]

|         | 1       | 2     | 3     | 4     |        |          |       |        |
|---------|---------|-------|-------|-------|--------|----------|-------|--------|
| BW      | 35.33   |       |       |       |        |          |       |        |
| BT      | 34.33   |       |       |       |        |          |       |        |
| B2      | 19.09   | 18.6  |       |       | 样品     | BA       | MT2   |        |
| B6      | 16.58   | 16.41 |       |       | CK21   | Ct值      | Ct值   | M2     |
|         |         |       |       |       | CK22   | 19.09    | 20.47 | Ct值    |
|         |         |       |       |       |        | 18.6     | 18.69 | 18.11  |
| MT2     | 20.47   | 18.69 | 16.88 |       |        |          |       | 17.89  |
| M2      | 18.11   | 17.89 |       |       |        |          |       |        |
| M3      | 17.48   | 17.7  | 18.1  | 18.21 |        | BA       |       | 18.845 |
| MS2     | 24.01   | 21.67 |       |       |        | M2       |       | 17.59  |
| W3      | 18.95   | 19.45 |       |       |        |          |       | 22.84  |
| WS2     | 34.19   |       |       |       |        | M3       |       | 18     |
|         |         |       |       |       |        | M5       |       | 19.06  |
| MT5     | 22.6    | 17.65 | 18.14 | 17.39 |        | M6       |       | 20.345 |
| M1      | 18.76   | 19.36 |       |       |        | M8       |       | 19.315 |
| W1      | 19.31   | 20.72 |       |       |        | M10      |       | 19.385 |
|         |         |       |       |       |        |          |       |        |
| MT8     | 19.64   | 17.36 | 17.54 | 18.26 |        |          |       |        |
| MS8     | 32.82   | 20.22 |       |       |        |          |       |        |
| WS8     | 20.23   | 19.31 |       |       |        |          |       |        |
|         |         |       |       |       |        |          |       |        |
| MT6     | 17.41   | 17.06 | 17.21 |       |        |          |       |        |
| MC6     | 19.79   | 19.33 |       |       |        |          |       |        |
| MS6     | 19.17   | 19.46 |       |       |        |          |       |        |
| CD6     | 16.68   | 16.55 | 17.42 | 17.04 |        |          |       |        |
|         |         |       |       |       |        |          |       |        |
| MT10    | 16.82   | 16.67 | 16.82 | 16.5  |        |          |       |        |
| MS10    | 19.26   | 19.51 |       |       |        |          |       |        |
| WS10    | 20.26   | 19.73 |       |       |        |          |       |        |
|         |         |       |       |       |        |          |       |        |
| MT11    | 17.83   | 18    | 17.02 | 17.35 |        |          |       |        |
|         |         |       |       |       |        |          |       |        |
| W2      | 19.68   | 19.43 |       |       |        |          |       |        |
|         |         |       |       |       |        |          |       |        |
|         | 0 Ct    | Ct    | Ct平均值 | ▲ct   |        |          |       |        |
|         | mettl3  | 22.07 | 22.79 | 22.43 | -5.16  |          |       |        |
|         | fto     | 22.33 | 24.32 | 23.32 | -4.27  |          |       |        |
|         | ythdc2  | 23.15 | 24.95 | 24.05 | -3.54  |          |       |        |
|         | ythdf3  | 30.4  | 29.66 | 30.03 | 2.44   |          |       |        |
|         | mettl14 | 22.4  | 22.35 | 22.37 | -5.22  |          |       |        |
|         | alkbh5  | 21.09 | 21.23 | 21.16 | -6.43  |          |       |        |
|         | ythdf1  | 20.57 | 20.65 | 20.26 | -7.33  |          |       |        |
|         | gapdh   | 26.85 | 28.33 | 27.59 | 0      |          |       |        |
|         | wtap    | 20.47 | 19.62 | 20.05 | -7.54  |          |       |        |
|         | ythdc1  | 18.8  | 19.1  | 18.95 | -8.64  |          |       |        |
|         | ythdf2  | 19.48 | 19.17 | 19.32 | -8.27  |          |       |        |
|         | b-actin | 14.54 | 15.26 | 14.9  | -12.69 |          |       |        |
| Ct      | Ct      | Ct平均值 | 0     | ▲ct   | ▲▲ct   | 2-▲▲ct   |       |        |
| METTL3  | 25.13   | 25.36 | 25.24 | -2.75 | 2.41   | 0.188156 |       |        |
| FTO     | 23.47   | 23.78 | 23.62 | -4.37 | -0.1   | 1.071773 |       |        |
| YTHDC2  | 26.22   | 26    | 26.11 | -1.88 | 1.66   | 0.316439 |       |        |
| YTHDF3  | 34.4    | 33.73 | 34.06 | 6.07  | 3.63   | 0.080772 |       |        |
| METTL14 | 24.98   | 25.38 | 25.18 | -2.81 | 2.41   | 0.188156 |       |        |
| ALKBH5  | 20.42   | 20.62 | 20.52 | -7.47 | -1.04  | 2.056228 |       |        |
| YTHDF1  | 20.74   | 20.61 | 20.68 | -7.31 | 0.02   | 0.986233 |       |        |
| GAPDH   | 28.01   | 27.97 | 27.99 | 0     | 0      | 0        |       |        |

|         |       |       |       |        |       |          |
|---------|-------|-------|-------|--------|-------|----------|
| WTAP    | 21.22 | 20.85 | 21.03 | -6.96  | 0.58  | 0.668964 |
| YTHDC1  | 19.19 | 19    | 19.09 | -8.9   | -0.26 | 1.197479 |
| YTHDF2  | 20.61 | 19.79 | 20.2  | -7.79  | 0.48  | 0.716978 |
| B-ACTIN | 16.14 | 15.31 | 15.73 | -12.26 | 0.43  | 0.742262 |

|         |       |       |        |        |
|---------|-------|-------|--------|--------|
| b-actin | 19.09 | 18.6  | 18.845 | 0      |
| W3      | 18.95 | 19.45 | 19.2   | 0.355  |
| WS2     | 34.19 | 34.33 | 34.26  | 15.415 |
| W2      | 19.68 | 19.43 | 19.555 | 0.71   |
| W1      | 19.31 | 20.72 | 20.015 | 1.17   |
| WS8     | 20.23 | 19.31 | 19.77  | 0.925  |
| WS6     | 19.17 | 19.46 | 19.315 | 0.47   |
| WS10    | 20.26 | 19.73 | 19.995 | 1.15   |
| BA      | 19.09 | 18.6  | 18.69  |        |
| M3      | 17.48 | 17.7  | 17.36  |        |
| MS2     | 24.01 | 21.67 |        |        |
| M2      | 18.11 | 17.89 | 18.26  |        |
| M1      | 18.76 | 19.36 | 18.21  |        |
| MS8     | 20.47 | 20.22 | 19.64  |        |
| MS6     | 19.17 | 19.46 | 19.36  |        |
| MS10    | 19.26 | 19.51 | 19.24  |        |

|        |        |        |        |        |          |
|--------|--------|--------|--------|--------|----------|
| ▲ ct   | ▲ ct   | ▲ ct   |        |        |          |
| -1.365 | -0.245 | -0.155 | 0      | 0      | 1        |
| -1.365 | -0.9   | -1.485 | -1.255 | -1.61  | 3.052518 |
|        |        |        | 3.995  | -11.42 | 2740.076 |
| -0.735 | -0.955 | -0.585 | -0.845 | -1.555 | 2.938337 |
| -0.085 | 0.515  | -0.635 | 0.215  | -0.955 | 1.93858  |
| 1.625  | 1.375  | 0.795  | 1.5    | 0.575  | 0.671286 |
| 0.325  | 0.615  | 0.515  | 0.47   | 0      | 1        |
| 0.415  | 0.665  | 0.395  | 0.54   | -0.61  | 1.526259 |

|        |        |        |          |          |          |             |
|--------|--------|--------|----------|----------|----------|-------------|
| ▲▲ ct  | ▲▲ ct  | ▲▲ ct  | 2-▲▲ ct  | 2-▲▲ ct  | 2-▲▲ ct  |             |
| -1.365 | -0.245 | -0.155 | 2.575763 | 1.185093 | 1.113422 | 1 Control   |
| -1.72  | -1.255 | -1.84  | 3.294364 | 2.386671 | 3.5801   | 3.052518 M3 |
| -0.65  | -1.665 | -1.295 | 1.569168 | 3.171137 | 2.45377  | 2.938337 M2 |
| -0.085 | -0.655 | -1.805 | 1.060688 | 1.687632 | 3.494292 | 1.93858 M1  |
| 0.7    | 0.45   | -0.13  | 0.615572 | 0.732043 | 1.094294 |             |
| -0.145 | 0.145  | 0.045  | 1.105731 | 0.904379 | 0.96929  | 1 WT        |
| -0.735 | -0.485 | -0.755 | 1.664397 | 1.399586 | 1.574616 |             |

|          |          |          |          |
|----------|----------|----------|----------|
| Control  | M1       | M2       | M3       |
| 0.843816 | 2.386671 | 2.722628 | 3.294364 |
| 1.185093 | 1.687632 | 3.171137 | 2.386671 |
| 1.113422 | 3.494292 | 2.45377  | 3.5801   |
| 1        | 1.93858  | 2.938337 | 3.052518 |
